# Supplementary material for: Social Isolation, Hospitalization, and Deaths from Cardiovascular Diseases during the COVID-19 Epidemic in São Paulo Metropolitan Area in 2020
Source: MDPI journal article supplement (doi:10.3390/ijerph191711002), 2022-09-02
Supplement: s1 [file s1]

Table S1(supplementary material): Social isolation (SI) and hospitalizations for cardiovascular disease (CVD), ischemic heart disease (IHD), and stroke from March/2020 to January/2021.

|              | <b>SI (%)</b> | <b>CVD</b> | <b>IHD</b> | <b>Stroke</b> |
|--------------|---------------|------------|------------|---------------|
| March/20     | 43,07         | 52,11      | 14,16      | 9,96          |
| April/20     | 52,33         | 34,69      | 10,19      | 7,78          |
| May/20       | 50,71         | 29,91      | 8,43       | 7,46          |
| June/20      | 48,47         | 34,37      | 9,75       | 8,41          |
| July/20      | 45,77         | 38,22      | 10,78      | 8,27          |
| August/20    | 44,45         | 41,57      | 11,85      | 8,66          |
| September/20 | 43,13         | 45,29      | 13,13      | 8,13          |
| October/20   | 42,32         | 45,60      | 11,90      | 8,93          |
| November/20  | 41,47         | 49,85      | 13,40      | 9,23          |
| December/20  | 40,94         | 41,55      | 12,19      | 8,00          |
| January/21   | 42,03         | 46,40      | 13,00      | 9,65          |
